# Supplementary material
Source: PubMed Central journal article supplement (PMC6783313)
Supplement: EMS84149-supplement-Supplementary_table_1.pdf [file EMS84149-supplement-Supplementary_table_1.pdf]

**Supplementary Table 1: Cloning primers.**

| Primer name     | Primer sequence (5'→3')                                       |
|-----------------|---------------------------------------------------------------|
| ClpP2 ΔC-3 fwd  | TGATATTATCATTAATAAATCTGGCCATCATCATCATCATCACTAACTCG            |
| ClpP2 ΔC-3 rev  | CGAGTTAGTGATGATGATGATGATGATGGCCAGATTTATTAATGATAATATCA         |
| ClpP2 ΔC-4 fwd  | GGCTTAATTGATGATATTATCATTAATAAATCTCATCATCATCATCACTAACT         |
| ClpP2 ΔC-4 rev  | AGTTAGTGATGATGATGATGATGATGAGATTTATTAATGATAATATCATCAATTAAGCC   |
| ClpP2 ΔC-5 fwd  | AGATTACGGCTTAATTGATGATATTATCATTAATAAACATCATCATCATCACTA        |
| ClpP2 ΔC-5 rev  | TAGTGATGATGATGATGATGATGTTTTATTAATGATAATATCATCAATTAAGCCGTAATCT |
| ClpP2 ΔC-6 fwd  | TATCATTAATCATCATCATCATCACTAACTCGAGTC                          |
| ClpP2 ΔC-6 rev  | GATGATGATGATTAATGATAATATCATCAATTAAGCCGTAATC                   |
| ClpX ΔZBD fwd   | TTGGCACTTCACCAAAGCCCTGAAAATAAAGATTCTCAAAG                     |
| ClpX ΔZBD rev   | TCTTTATTTTCAGGGCTTTGGTGAAGTGCCAAAACC                          |
| ClpX V264C fwd  | CGTTAAAAATCGAATGGGTGAAAAATGCATTGGATTTGGTACAGATAATGC           |
| ClpX V264C rev  | GCATTATCTGTACCAAATCCAATGCATTTTTTCACCCATTCGATTTTTAACG          |
| ClpX I265C fwd  | TAAAAATCGAATGGGTGAAAAAGTCTGTGGATTTGGTACAGATAATGCGAAA          |
| ClpX I265C rev  | TTTCGCATTATCTGTACCAAATCCACAGACTTTTTTCACCCATTCGATTTTTA         |
| ClpX G266C fwd  | CGTTAAAAATCGAATGGGTGAAAAAGTCAATTTGCTTTGGTACAGATAATGC          |
| ClpX G266C rev  | GCATTATCTGTACCAAAGCAAATGACTTTTTTCACCCATTCGATTTTTAACG          |
| ClpX F267C fwd  | TCGAATGGGTGAAAAAGTCAATGGATGTGGTACAGATAATGC                    |
| ClpX F267C rev  | GCATTATCTGTACCACATCCAATGACTTTTTTCACCCATTCGA                   |
| ClpP2 I91C fwd  | GGACGTACAAACATGCGGCATGGGTATGGCAGC                             |
| ClpP2 I91C rev  | GCTGCCATACCCATGCCGCATGTTTGTACGTCC                             |
| ClpP2 L115C fwd | GCAAATGGCAAACGTTTTGCCTGCCCAAACGCTGAAATTATG                    |
| ClpP2 L115C rev | CATAATTTTCAGCGTTTGGGCAGGCAAACGTTTGCCATTTGC                    |
| ClpP2 I190C fwd | CAAAGATTACGGCTTAATTGATGATATTTGCATTAATAAATCTGGCTTAAAAGGCCATC   |
| ClpP2 I190C rev | GATGGCCTTTTAAGCCAGATTTATTAATGCAAATATCATCAATTAAGCCGTAATCTTTTG  |
